# Supplementary material for: Sub-THz Vibrational Dynamics in Ordered Mesoporous Silica Nanoparticles
Source: MDPI journal article supplement (doi:10.3390/nano13142078), 2023-07-15
Supplement: s1 [file s1]

### 1. SBA-15 MSNs

The XRD patterns,  $N_2$  physisorption isotherms and Raman spectra of the SBA-15 MSNs calcined at 550, 700 and 800 °C are presented in Figures S1, S2 and S3.

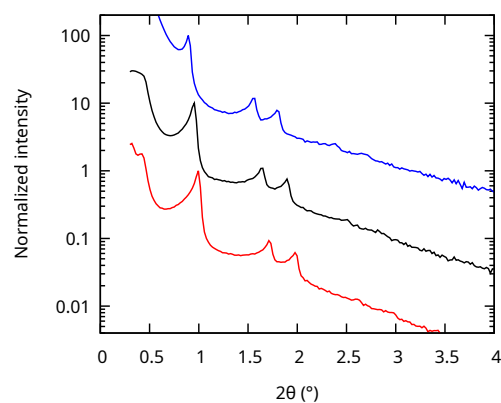

**Figure S1.** XRD patterns of the SBA-15 MSNs calcined at 800 °C (red), 700 °C (black), 550 °C (blue) from bottom to top. They are vertically shifted for clarity.

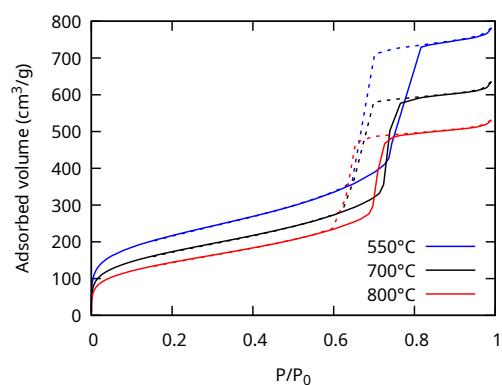

**Figure S2.**  $N_2$  physisorption isotherms of the SBA-15 MSNs calcined at 800 °C (red), 700 °C (black), 550 °C (blue) from bottom to top. The full and dashed curves are the adsorption and desorption branches of the isotherm respectively.

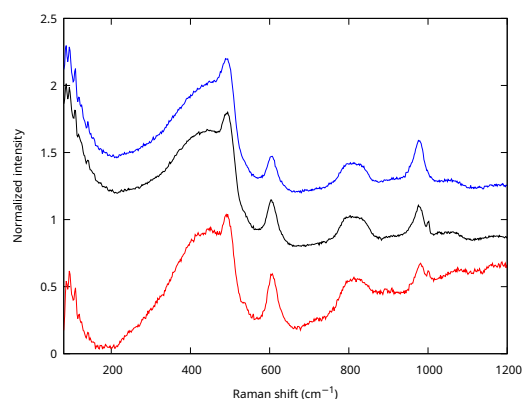

**Figure S3.** Raman spectra of the SBA-15 MSNs calcined at 550, 700 and 800 °C from top to bottom. The intensities are normalized and the spectra are vertically shifted for clarity.

A representative SEM image of the sample calcined at 700 °C is shown in Figure S4. It shows that the size and shape distributions of the MSNs are quite large. Most of the NPs are elongated with a diameter of about 0.5  $\mu\text{m}$  and lengths of a few  $\mu\text{m}$ . The SEM images for the other 2 samples show NPs having similar shapes and dimensions.

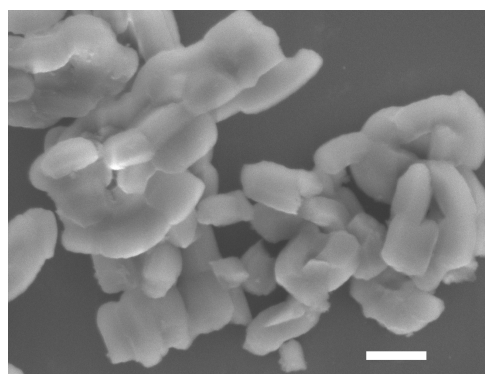

**Figure S4.** Representative SEM image of the SBA-15 sample calcined at 700 °C (scale bar: 1  $\mu\text{m}$ ).

## 2. SiO<sub>2</sub> NPs

Figure S5 shows the size distribution determined from SEM images and a representative SEM image for the non-porous silica NPs. The NPs are approximately spherical with a narrow size distribution and a 132 nm average diameter.

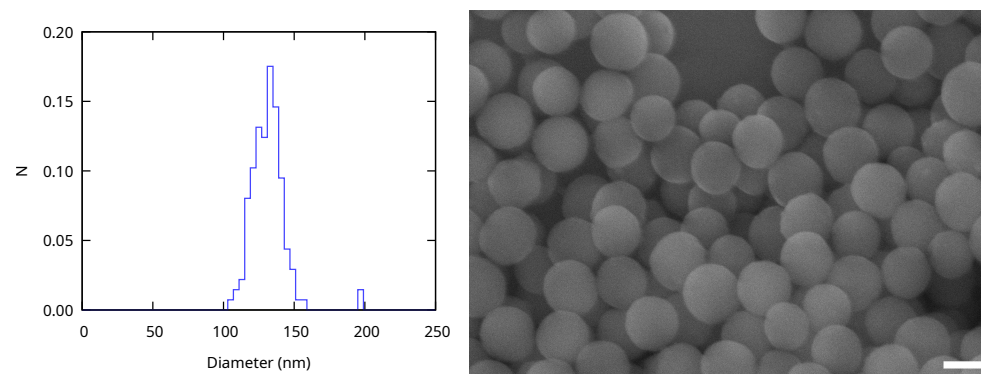

**Figure S5.** Size distribution and representative SEM image of the SiO<sub>2</sub> NPs (scale bar: 100 nm).

The corresponding Raman spectra are shown in Figure S6. They contain a photoluminescence background and C–H stretching bands near 2900  $\text{cm}^{-1}$  due to remaining organic moieties. The SiO<sub>2</sub> network peaks are present. The SiOH band and the D<sub>1</sub> peak are also

present and quite intense showing that the condensation of silica is not as complete as in the previous annealed SBA-15 MSNs. The D<sub>2</sub> peak is not seen.

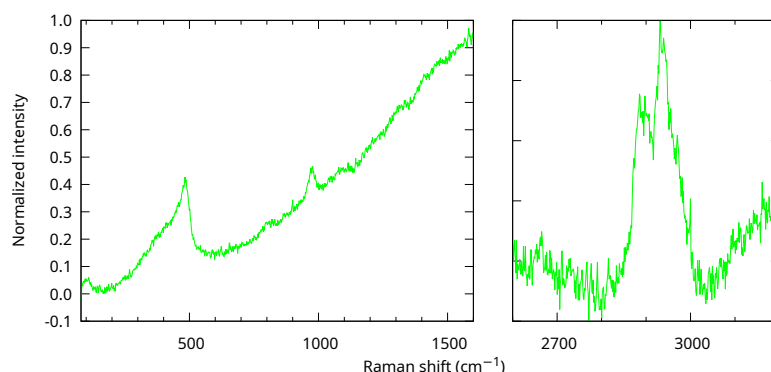

**Figure S6.** Raman spectra of the SiO<sub>2</sub> NPs (not calcined).

### 3. Brillouin peaks fitting

To determine the Brillouin peak frequencies, the spectra were fitted using the non-linear least-squares Marquardt-Levenberg algorithm (gnuplot software package version 5.4 patchlevel 4). A lorentzian line shape was used for the Brillouin peak. For the SBA-15 MSNs, the Brillouin and Rayleigh peaks overlap. Therefore, the Rayleigh peak was also fitted with a lorentzian line shape. The results are presented in Figure S7. In all cases, the fit converged and the asymptotic standard error for the peak position was lower than a few %. The frequencies reported in the manuscript correspond to the position of the maxima rounded with 2 significant digits.

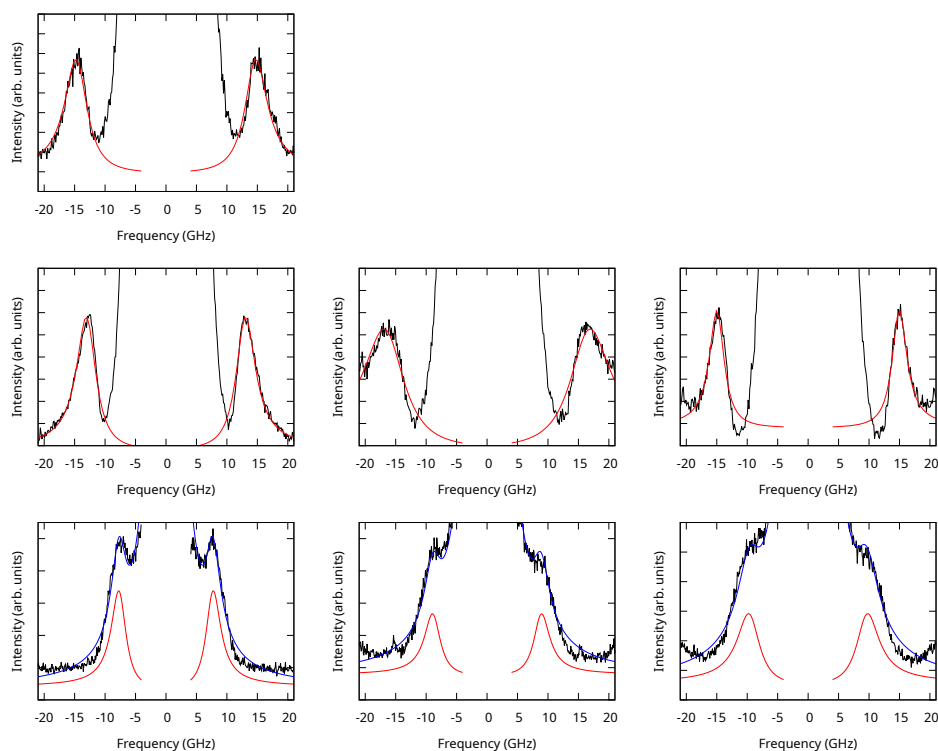

**Figure S7.** Fit of the Brillouin peaks by a lorentzian shape. The first line is for the non-porous SiO<sub>2</sub> NPs. The second and third lines are for the MCM-41 and SBA-15 MSNs respectively for calcination temperatures 550, 700 and 800 °C from left to right.
